# Supplementary material
Source: bioRxiv or medRxiv preprint supplement (https://medrxiv.org/highwire/filestream/75624/field_highwire_adjunct_files/0/2020.03.28.20045997-1.pdf)
Supplement: Supplementary file [file 2020.03.28.20045997-1.pdf]

**Supplementary Table 1: Number of measurements for basic demographics and clinical features of patients in the developmental and validation datasets.**

|                         | <b>Developmental</b>  | <b>Validation</b>        |                      |
|-------------------------|-----------------------|--------------------------|----------------------|
|                         | <b>Tongji (N=299)</b> | <b>Jinyintan (N=145)</b> | <b>Total (N=444)</b> |
| Age (Years)             | 299                   | 145                      | 444                  |
| Gender                  | 299                   | 145                      | 444                  |
| Days since onset        | 294                   | 145                      | 439                  |
| Co-morbidities          |                       |                          |                      |
| Hypertension            | 298                   | 145                      | 443                  |
| Diabetes                | 297                   | 145                      | 442                  |
| COPD                    | 298                   | 145                      | 443                  |
| Heart Failure           | 298                   | 145                      | 443                  |
| Smoking                 | 298                   | 145                      | 443                  |
| Other                   | 298                   | 145                      | 443                  |
| Outcome                 | 299                   | 145                      | 444                  |
| SPO <sub>2</sub>        | 296                   | 130                      | 426                  |
| SOFA score              | 299                   | 145                      | 444                  |
| Systolic blood pressure | 298                   | 144                      | 442                  |
| WBC                     | 296                   | 143                      | 439                  |
| Lymphocyte count        | 297                   | 143                      | 440                  |
| Platelet count          | 294                   | 142                      | 436                  |
| D-dimer                 | 258                   | 139                      | 397                  |
| Albumin                 | 296                   | 142                      | 438                  |
| hs-cTnI                 | 242                   | 138                      | 380                  |
| ALT                     | 294                   | 143                      | 437                  |
| AST                     | 296                   | 143                      | 439                  |
| Bilirubin               | 296                   | 143                      | 439                  |
| BUN                     | 296                   | 143                      | 439                  |
| Creatinine              | 296                   | 143                      | 439                  |
| Creatinine kinase       | 110                   | 143                      | 253                  |
| LDH                     | 281                   | 143                      | 424                  |
| CRP                     | 286                   | 142                      | 428                  |
| Procalcitonin           | 227                   | 139                      | 366                  |
| Interleukin-6           | 131                   | 93                       | 224                  |
| INR                     | 265                   | 141                      | 406                  |

ALT= Alanine aminotransferase. AST= Aspartate aminotransferase. BUN=Blood urea nitrogen. COPD=chronic obstructive disease. CRP= C-reactive protein. hs-cTnI= high-sensitivity cardiac troponin I. INR= international normalized ratio. LDH= lactate dehydrogenase. SOFA= sequential organ failure assessment. SPO<sub>2</sub>= pulse oxygen saturation. WBC=white blood cell.
